# Supplementary material for: Effect of nitrogen co-doping with ruthenium on the catalytic performance of Ba/Ru–N-MC catalysts for ammonia synthesis
Source: Royal Society of Chemistry journal article supplement (doi:10.1039/c9ra03097b), 2019-01-01
Supplement: c9ra03097b1.pdf [file c9ra03097b1.pdf]

## Supporting information

### Effect of nitrogen co-doping with ruthenium on the catalytic performance of Ba/Ru-N-MC catalysts for ammonia synthesis

Yongcheng Ma,<sup>a</sup> Guojun Lan,<sup>a</sup> Xiaolong Wang,<sup>a</sup> Geshan Zhang,<sup>a</sup> Wenfeng Han,<sup>a</sup> Haodong Tang,<sup>a</sup>

Huazhang Liu,<sup>a</sup> Ying Li,<sup>a\*</sup>

<sup>a</sup> Institute of Industrial Catalysis, Zhejiang University of Technology, Chaowang Road 18, Hangzhou, China

\*Corresponding author: Prof Ying Li, Tel: (+86)-571-88320766; E-mail: liying@zjut.edu.cn

Table S1 Textural properties and Ru dispersion of the Ru-MC and Ba/Ru-MC samples.

| Samples  | Ru <sup>a</sup><br>(wt%) | S. A. <sup>b</sup><br>(m <sup>2</sup> ·g <sup>-1</sup> ) | P. V. <sup>c</sup><br>(cm <sup>3</sup> ·g <sup>-1</sup> ) | P. D. <sup>d</sup><br>(nm) | CO uptake<br>(μmol/g) | Dispersion<br>(%) | Particle size<br>(nm) |
|----------|--------------------------|----------------------------------------------------------|-----------------------------------------------------------|----------------------------|-----------------------|-------------------|-----------------------|
| Ru-MC    | 4.59                     | 928                                                      | 1.44                                                      | 9.2                        | 154.2                 | 34.2              | 3.9                   |
| Ba/Ru-MC | 4.21                     | 920                                                      | 1.41                                                      | 9.2                        | 140.8                 | 34.0              | 3.9                   |

<sup>a</sup> Ru wt% was measured by the spectrophotometric method. <sup>b</sup> The specific surface area. <sup>c</sup> The total pore volume. <sup>d</sup> Pore diameter calculated by the desorption branches of the isotherms using the BJH method.

Table S2 Comparison of ammonia synthesis reaction activity reported in other literatures.

| Samples    | Ru<br>(%) | Reaction rate<br>(mmol·g <sup>-1</sup> ·h <sup>-1</sup> ) | TOF<br>(s <sup>-1</sup> ) | Temp.<br>(°C) | Pressure<br>(MPa) | GHSV<br>(h <sup>-1</sup> ) | Ref.      |
|------------|-----------|-----------------------------------------------------------|---------------------------|---------------|-------------------|----------------------------|-----------|
| Ba/Ru-N-MC | 3.75      | 175                                                       | 0.387                     | 450           | 10                | 10000                      | This work |
| Ba/Ru-N-MC | 3.75      | 79                                                        | 0.160                     | 400           | 10                | 10000                      | This work |
| Ba-Ru/N-MC | 4.07      | 27                                                        | 0.034                     | 400           | 10                | 10000                      | This work |
| Ba-Ru/CNTs | 4.0       | 69                                                        | -                         | 450           | 10                | 10000                      | [1]       |
| Ba-Ru/AC   | 9.1       | -                                                         | 0.098                     | 400           | 6.3               | 6500                       | [2]       |
| Ru-Ba/AC   | 4.0       | -                                                         | 0.048                     | 400           | 3                 | 3000                       | [3]       |
| Ru-Ba/ACF  | 4.0       | -                                                         | 0.030                     | 400           | 3                 | 3000                       | [4]       |
| Ru-Ba/CMS  | 4.0       | -                                                         | 0.089                     | 400           | 3                 | 3000                       | [4]       |

Table S3 The peak position of various catalysts measured by H<sub>2</sub>-TPR.

| Catalysts  | Peak Temperature (°C) of various possible species                      |                                            |                                        |                                            |                                |                                             |
|------------|------------------------------------------------------------------------|--------------------------------------------|----------------------------------------|--------------------------------------------|--------------------------------|---------------------------------------------|
|            | 18/H <sub>2</sub> O<br>RuO <sub>x</sub> <sup>+</sup><br>H <sub>2</sub> | 18/H <sub>2</sub> O<br>Ba(OH) <sub>2</sub> | 15/CH <sub>4</sub><br>C+H <sub>2</sub> | 18/H <sub>2</sub> O<br>SFGs+H <sub>2</sub> | 28/CO<br>SFGs<br>decomposition | 44/CO <sub>2</sub><br>SFGs<br>decomposition |
| Ru/N-MC    | 237                                                                    | -                                          | 282-505                                | 589                                        | 652                            | 603                                         |
| Ba-Ru/N-MC | 183                                                                    | 203                                        | 277                                    | 523                                        | 640                            | none                                        |
| Ru-N-MC    | 155                                                                    | -                                          | 230                                    | 550                                        | 608                            | 155, 210, 559                               |
| Ba/Ru-N-MC | 190                                                                    | 200                                        | 220                                    | none                                       | 672                            | 182                                         |

Table S4 Textural properties of Ba-Ru/N-MC-used and Ba/Ru-N-MC-used catalysts.

| Catalysts       | S. A. <sup>a</sup><br>(m <sup>2</sup> ·g <sup>-1</sup> ) | P. V. <sup>b</sup><br>(cm <sup>3</sup> ·g <sup>-1</sup> ) | P. D. <sup>c</sup><br>(nm) | S. A. decreased<br>(%) |
|-----------------|----------------------------------------------------------|-----------------------------------------------------------|----------------------------|------------------------|
| Ba-Ru/N-MC-used | 678                                                      | 0.98                                                      | 9.2                        | 6.4                    |
| Ba/Ru-N-MC-used | 630                                                      | 0.88                                                      | 9.2                        | 2.6                    |

<sup>a</sup> The specific surface area. <sup>b</sup> The total pore volume. <sup>c</sup> Pore diameter calculated by the desorption branches of the isotherms using the BJH method.

Table S5 The elemental composition of the carbon materials is measured by elementary analysis.

| Catalysts       | Elemental content (wt.%) |       |      |      |
|-----------------|--------------------------|-------|------|------|
|                 | N                        | C     | H    | S    |
| Ru-N-MC         | 1.44                     | 72.37 | 1.85 | 0.48 |
| Ba/Ru-N-MC      | 1.41                     | 68.79 | 1.78 | 0.24 |
| Ba/Ru-N-MC-used | 1.64                     | 66.96 | 1.92 | 0.19 |

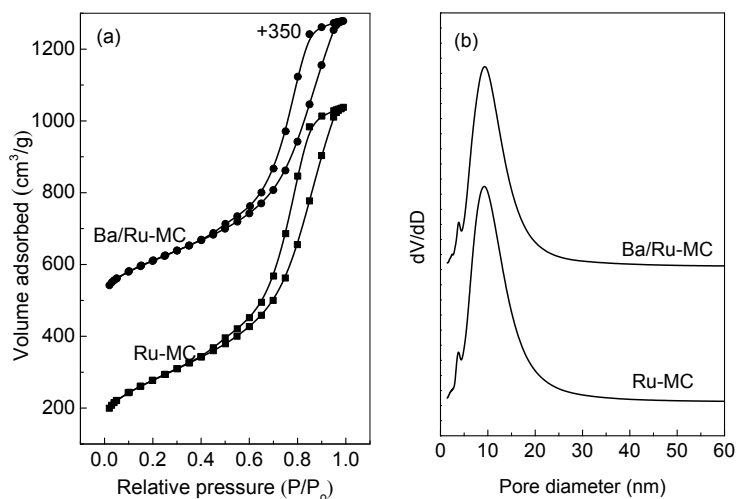

Fig. S1 (a) N<sub>2</sub> adsorption-desorption isotherms and (b) pore size distribution curves of the Ru-MC and Ba/Ru-MC samples.

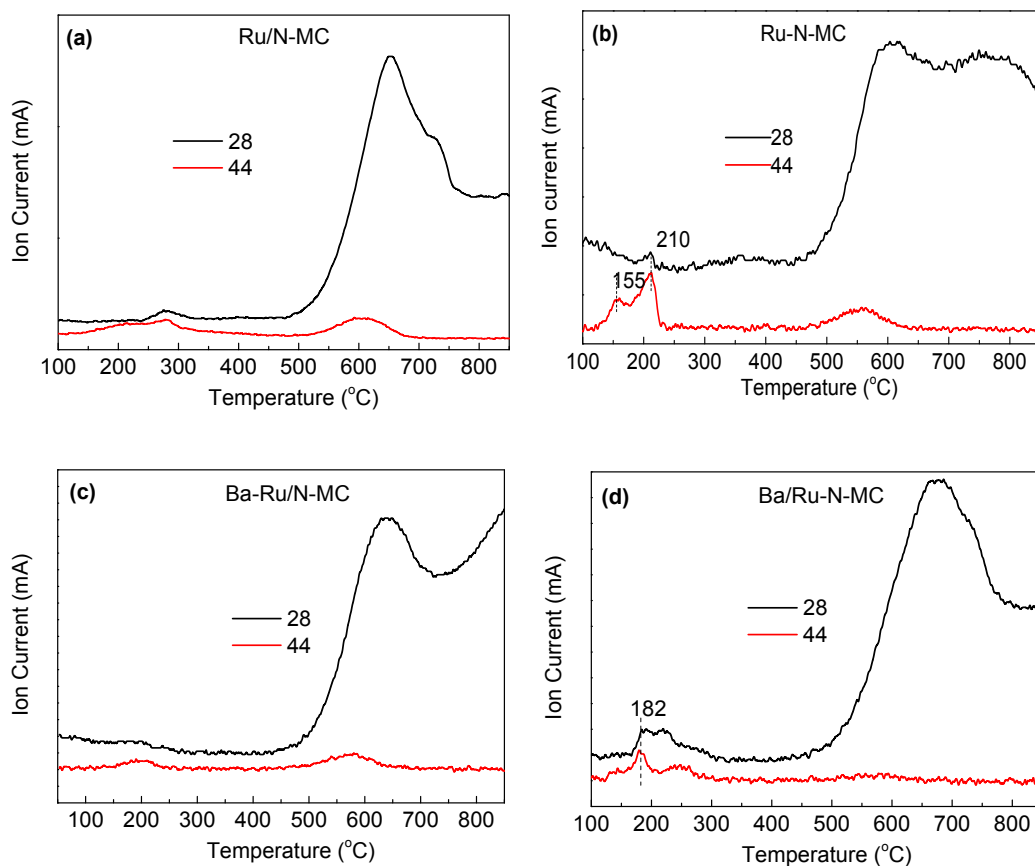

Fig. S2 The signal of CO and CO<sub>2</sub> in Temperature-programmed reduction profiles of the (a) Ru/N-MC, (b) Ru-N-MC, (c) Ba-Ru/N-MC and (d) Ba/Ru-N-MC catalysts under 5% H<sub>2</sub>/Ar atmosphere detected with a mass spectrometer.

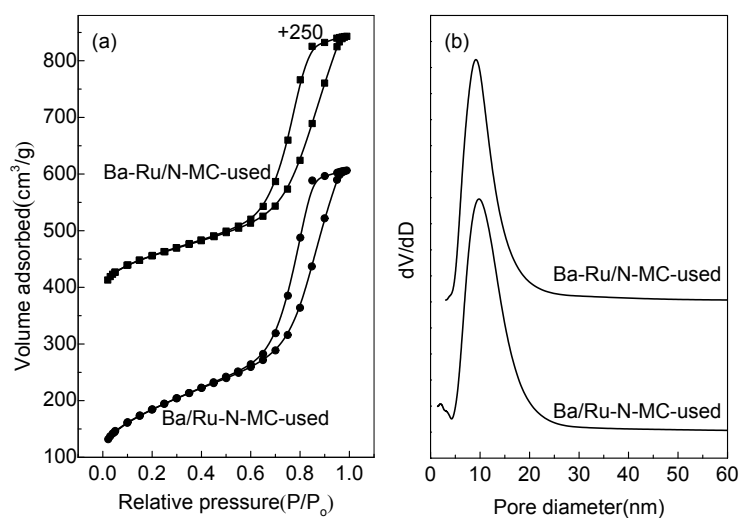

Fig. S3 (a) N<sub>2</sub> adsorption-desorption isotherms and (b) pore size distribution curves of Ba-Ru/N-MC-used and Ba/Ru-N-MC-used catalysts.

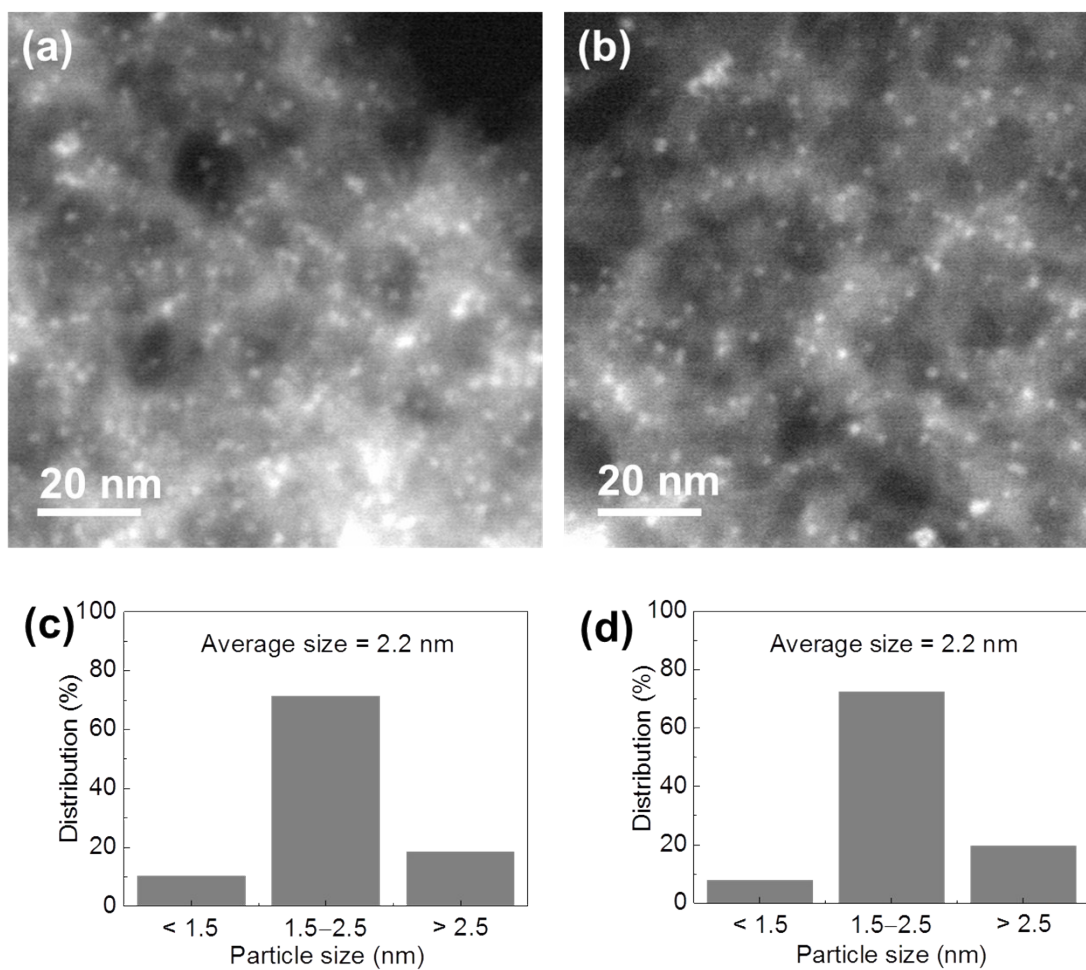

Fig. S4 HRTEM images and particle size distributions of (a, c) Ba-Ru/N-MC-used, (b, d) Ba/Ru-N-MC-used.

- [1] X. J. Yu, B. Y. Lin, B. B. Gong, J. X. Lin, R. Wang, K. M. Wei, *Catal. Lett.*, 2008, **124**, 168–173.
- [2] E. Truskiewicz, W. Raróg-Pilecka, K. Schmidt-Szałowski, S. Jodzis, E. Wilczkowska, D. Łomot, Z. Kaszukur, Z. Karpiński, Z. Kowalczyk, *J. Catal.*, 2009, **265**, 181–190.
- [3] C. H. Liang, Z. B. Wei, M. F. Luo, P. L. Ying, Q. Xin, C. Li, *Stu. Surf. Sci. Catal.*, 2001, **138**, 283–290.
- [4] C. H. Liang, Z. B. Wei, Q. Xin, C. Li, *Appl. Catal. A-Gen.*, 2001, **208**, 193–201.
